# Supplementary material
Source: Research Square preprint supplement (doi:10.21203/rs.3.rs-8776881/v1)
Supplement: Supplementary file 1 [file e2716f1a721391d34fe52605.docx]

Supplementary File 1: COREQ checklist

Consolidated criteria for reporting qualitative studies (COREQ): 32-item checklist

Developed from:

Tong A, Sainsbury P, Craig J. Consolidated criteria for reporting qualitative research (COREQ): a 32-item checklist for interviews and focus groups. International Journal for Quality in Health Care. 2007. Volume 19, Number 6: pp. 349 – 357

| **Item No** | | **Guide Questions/Description** | **Reported on Page #** |
| --- | --- | --- | --- |
| **Domain 1: Research team and reflexivity** | | | |
| **Personal Characteristics** | | | |
| 1. Interviewer/ facilitator | | Which author/s conducted the interview or focus group? | Pg 5 |
| 2. Credentials | | What were the researcher’s credentials? E.g., PhD, MD | Pg 1 |
| 3. Occupation | | What was their occupation at the time of the study? | Pg 5 |
| 4. Gender | | Was the researcher male or female? | Pg 5 |
| 5. Experience and training | | What experience or training did the researcher have? | Pg 5 |
| **Relationship with participants** | | | |
| 6. Relationship established | | Was a relationship established prior to study commencement? | Pg 5 |
| 7. Participant knowledge of the interviewer | | What did the participants know about the researcher? e.g. personal goals, reasons for doing the research? | Pg 5 |
| 8. Interviewer characteristics | | What characteristics were reported about the interviewer/facilitator? e.g. Bias, assumptions, reasons and interests in the research topic | Pg 5 |
| **Domain 2: study design** | | |
| **Theoretical framework** | | |
| 9. Methodological orientation and Theory | What methodological orientation was stated to underpin the study? e.g. grounded theory, discourse analysis, ethnography, phenomenology, content analysis | Pg 6 |
| **Participant selection** | | |
| 10. Sampling | How were participants selected? e.g., purposive, convenience, consecutive, snowball | Pg 5 |
| 11. Method of approach | How were participants approached? e.g., face-to-face, telephone, mail, email | Pg 5 |
| 12. Sample size | How many participants were in the study? | Pg 7 |
| 13. Non-participation Setting | How many people refused to participate or dropped out? Reasons? | Pg 7 |
| 14. Setting of data collection | Where was the data collected? e.g., home, clinic, workplace | Pg 5 |
| 15. Presence of nonparticipants | Was anyone else present besides the participants and researchers? | Pg 5 |
| 16. Description of sample | What are the important characteristics of the sample? e.g. demographic data, date | Pg 7 |
| **Data collection** | | |  | No |
| 17. Interview guide | Were questions, prompts, and guides provided by the authors? Was it pilot tested? | Pg 5-6 |
| 18. Repeat interviews | Were repeat interviews carried out? If yes, how many? | Pg 6 |
| 19. Audio/visual recording | Did the research use audio or visual recording to collect the data? | Pg 6 |
| 20. Field notes | Were field notes made during and/or after the interview or focus group? | Pg 6 |
| 21. Duration | What was the duration of the interviews or focus group? | Pg 7 |
| 22. Data saturation | Was data saturation discussed? | Pg 7 |
| 23. Transcripts returned | Were transcripts returned to participants for comment and/or correction? | N/A |
| **Domain 3: analysis and findings** | | |
| **Data analysis** | | |
| 24. Number of data coders | How many data coders coded the data? | Pg 6 |
| 25. Description of the coding tree | Did the authors provide a description of the coding tree? | N/A |
| 26. Derivation of themes | Were themes identified in advance or derived from the data? | Pg 6 |
| 27. Software | What software, if applicable, was used to manage the data? | N/A |
| 28. Participant checking | Did participants provide feedback on the findings? | N/A |
| **Reporting** | | |
| 29. Quotations presented | Were participant quotations presented to illustrate the themes/findings? Was each quotation identified? e.g., participant number | Pg 7-11 |
| 30. Data and findings consistent | Was there consistency between the data presented and the findings? | Pg 7-11 |
| 31. Clarity of major themes | Were major themes clearly presented in the findings? | Pg 7-11 |
| 32. Clarity of minor themes | Is there a description of diverse cases or a discussion of minor themes? | Pg 7-11 |
